# Supplementary material for: Thermal stability and electrochemical behavior of commercial polycrystalline and single-crystalline cathodes integrated with cubic Li 6.4 La 3 Zr 1.4 Ta 0.6 O 12 for all-solid-state lithium batteries
Source: Royal Society of Chemistry journal article supplement (doi:10.1039/d5ta03114a), 2025-01-01
Supplement: d5ta03114a1.pdf [file d5ta03114a1.pdf]

**Table S1.** Specifications of commercial cathode materials and garnet-type cubic LLZTO.

|           | Molecular Formula                                                            | D10<br>( $\mu\text{m}$ ) | D50<br>( $\mu\text{m}$ ) | D90<br>( $\mu\text{m}$ ) | BET<br>( $\text{m}^2/\text{g}$ ) | 1 <sup>st</sup> dis-capacity<br>(mAh/g) |
|-----------|------------------------------------------------------------------------------|--------------------------|--------------------------|--------------------------|----------------------------------|-----------------------------------------|
| LLZTO     | $\text{Li}_{6.4}\text{La}_3\text{Zr}_{1.4}\text{Ta}_{0.6}\text{O}_{12}$      |                          | 5                        |                          |                                  |                                         |
| pc-LNMO   | $\text{LiNi}_{0.5}\text{Mn}_{1.5}\text{O}_4$                                 | < 1                      | 3-6                      | <15                      |                                  | >130 (4.95-3.5 V)                       |
| pc-LCO    | $\text{LiCoO}_2$                                                             | $\geq 4.0$               | 14.0-18.0                | $\leq 45.0$              | 0.10-0.30                        | $\geq 188$ (4.5-3.0 V)                  |
| pc-NMC811 | $\text{LiNi}_{0.8}\text{Co}_{0.10}\text{Mn}_{0.10}\text{O}_2$                | $5.0 \pm 1.0$            | $10.0 \pm 2.0$           | $20.0 \pm 4.0$           | $0.6 \pm 0.3$                    | $\geq 205$ (4.3-3.0 V)                  |
| pc-NMC532 | $\text{LiNi}_{0.5}\text{Mn}_{0.3}\text{Co}_{0.2}\text{O}_2$                  | $\sim 5$                 | 10-14                    | $\leq 25$                | 0.2-0.5                          | 180-185 (4.4-2.7 V)                     |
| pc-NMC111 | $\text{Li}_{1.05}\text{Ni}_{0.33}\text{Mn}_{0.33}\text{Co}_{0.33}\text{O}_2$ | $\geq 1.7$               | $3.0 \pm 0.5$            | $\leq 7.0$               | $1.35 \pm 0.3$                   | $\geq 162$ (4.3-3.0 V)                  |
| pc-NMC631 | $\text{LiNi}_{0.67}\text{Mn}_{0.28}\text{Co}_{0.05}\text{O}_2$               |                          | $13.0 \pm 2.0$           |                          | $0.35 \pm 0.15$                  | $\geq 170$                              |
| sc-NMC631 | $\text{LiNi}_{0.6}\text{Mn}_{0.3}\text{Co}_{0.1}\text{O}_2$                  | $\geq 1.5$               | 3.3-4.5                  | 5.5-9.5                  | 0.6-1.3                          | $\geq 185$ (4.4-3.0 V)                  |

Note: Based on the molecular formula, polycrystalline  $\text{LiNi}_{0.67}\text{Mn}_{0.28}\text{Co}_{0.05}\text{O}_2$  is comparable to single-crystalline  $\text{LiNi}_{0.6}\text{Mn}_{0.3}\text{Co}_{0.1}\text{O}_2$  (sc-NMC631); therefore we label it as pc-NMC631.

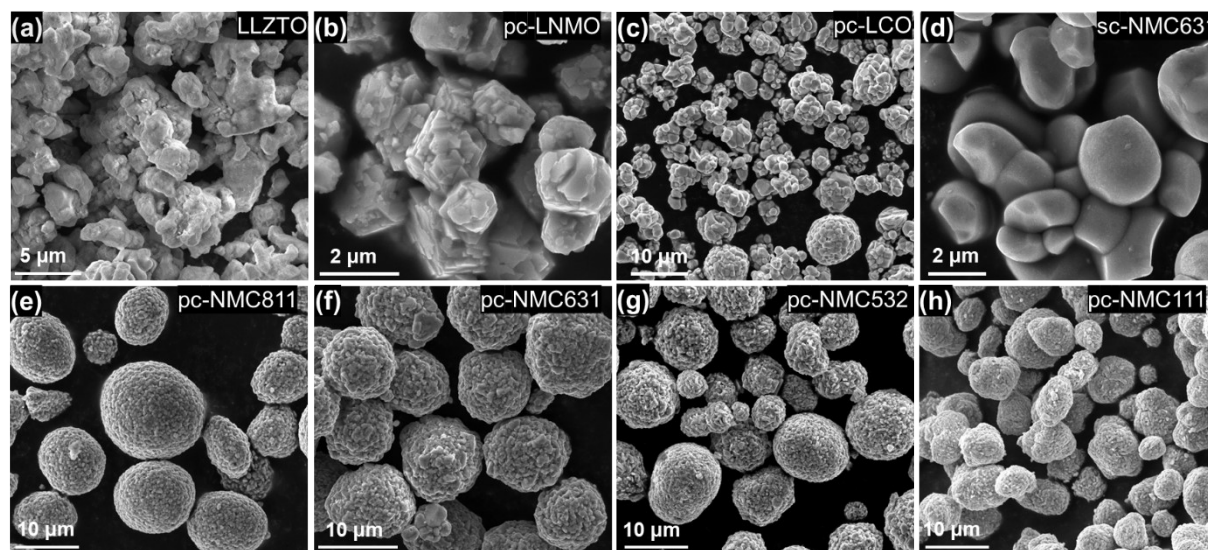

**Fig. S1** SEM images of (a) cubic LLZTO and various commercial cathode materials: (b) pc-LNMO, (c) pc-LCO, (d) sc-NMC631, (e) pc-NMC811, (f) pc-NMC631, (g) pc-NMC532, and (h) pc-NMC111.

All materials, including cubic LLZTO and the listed cathode materials, were obtained from commercial suppliers and used as received, without additional treatment. The molecular formula for polycrystalline  $\text{LiNi}_{0.67}\text{Mn}_{0.28}\text{Co}_{0.05}\text{O}_2$  (pc-NMC631), as provided by the supplier, closely match that of single crystalline  $\text{LiNi}_{0.6}\text{Mn}_{0.3}\text{Co}_{0.1}\text{O}_2$  (sc-NMC631). Therefore, we examined the impact of crystallographic structure on their electrochemical performance.

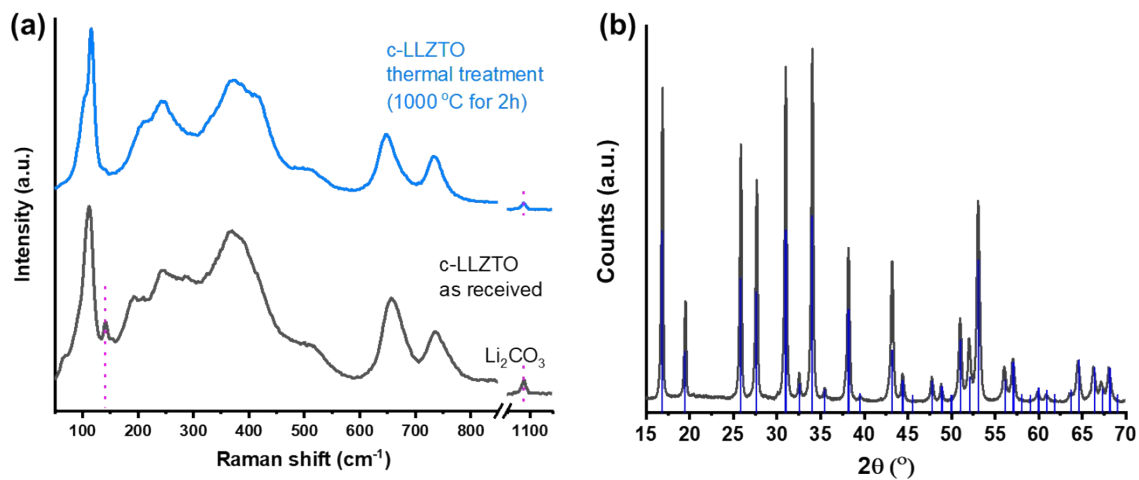

**Fig. S2** (a) Raman spectra and (b) XRD pattern of commercial cubic LLZTO.

We compared LLZTO sample before and after thermal treatment at 1000 °C for 2 hours in O<sub>2</sub> atmosphere. The Raman spectrum of the as-received sample exhibited more pronounced Li<sub>2</sub>CO<sub>3</sub> contamination on the surface.

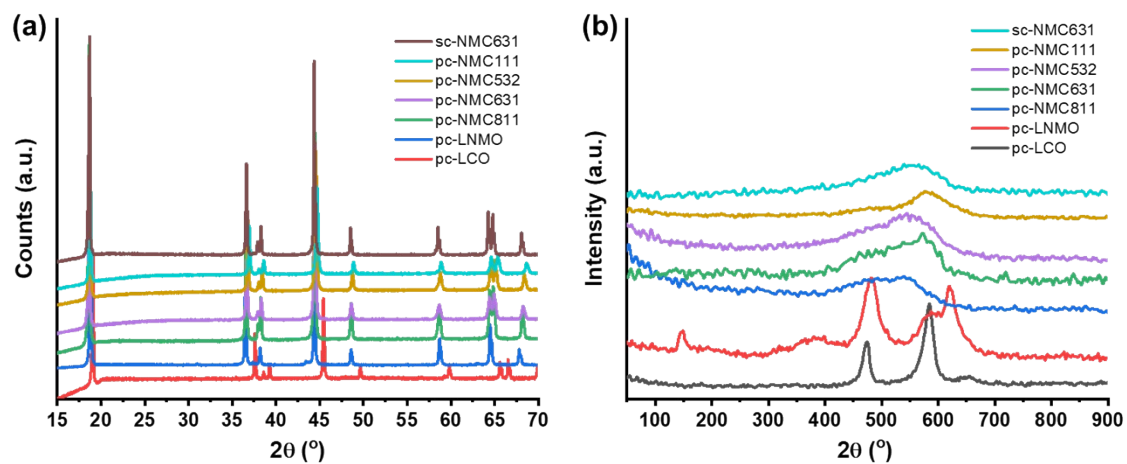

**Fig. S3** (a) XRD patterns and (b) Raman spectra of commercial cathode materials.

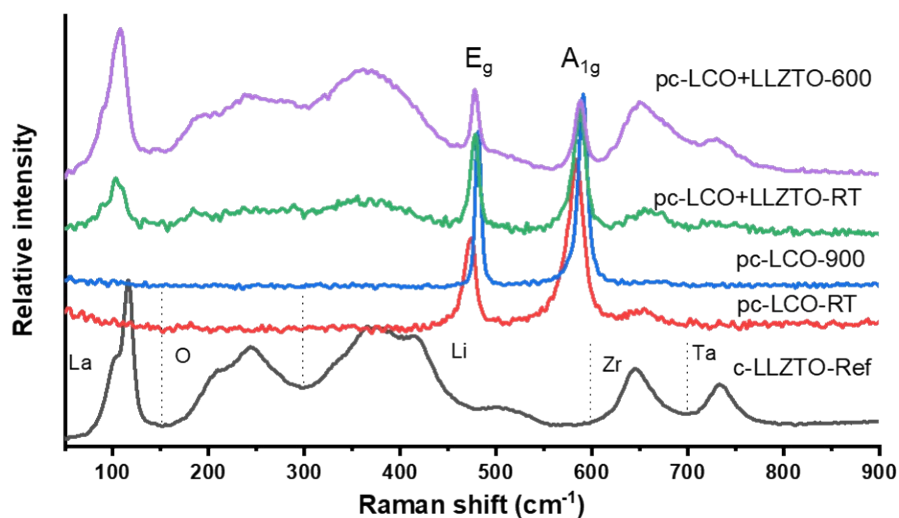

**Fig. S4** Raman spectra of pc-LCO heat-treated at 900°C and pc-LCO+LLZTO-600. Reference spectra of pc-LCO-RT, c-LLZTO, and pc-LCO+LLZTO-RT are included for comparison.

The unheated pc-LCO displayed characteristic peaks at 487  $\text{cm}^{-1}$  ( $E_g$  mode, O-Co-O bending) and 596  $\text{cm}^{-1}$  ( $A_{1g}$  mode, Co-O stretching). After heat-treatment at 900 °C, both peaks shifted by  $\sim 5 \text{ cm}^{-1}$  to higher frequencies, indicating modifications in stoichiometry and enhanced crystallinity of pc-LCO.

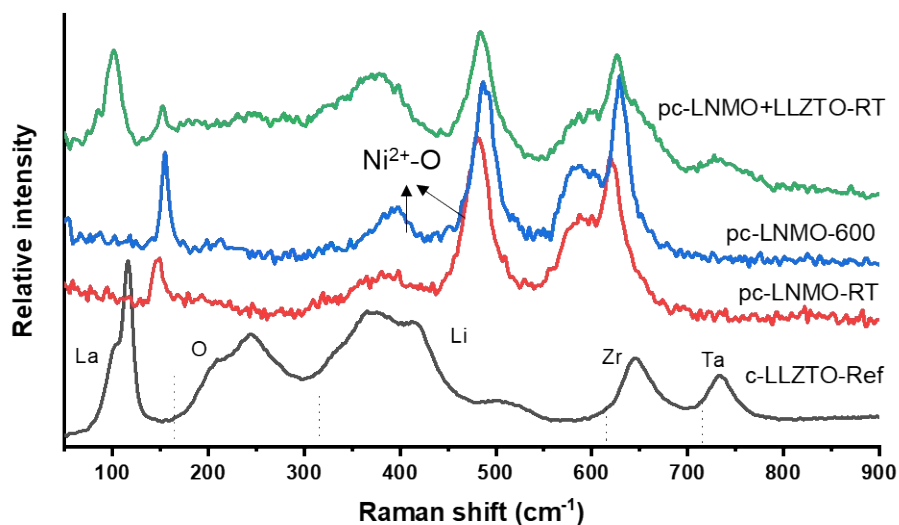

**Fig. S5** Raman spectra of pc-LNMO heat-treated at 600°C. Reference spectra of pc-LNMO-RT, c-LLZTO, and pc-LNMO+LLZTO-RT are included for comparison.

The unheated pc-LNMO displayed characteristic Raman bands between 100-700  $\text{cm}^{-1}$ , consistent with the  $\text{A}[\text{B}_2]\text{O}_4$  spinel structure and cubic  $\text{Fd}3\text{m}$  symmetry. Notably, the peak at 625  $\text{cm}^{-1}$  corresponds to the symmetric Mn-O stretching vibration of  $[\text{MnO}_6]$  octahedra, while the broad shoulder at 589  $\text{cm}^{-1}$  is associated with  $\text{Ni}^{2+}$  substitution for  $\text{Mn}^{4+}$ . Additionally, peaks at 482 and 393  $\text{cm}^{-1}$  are attributed to  $\text{Ni}^{2+}\text{-O}$  stretching vibrations. Following heat treatment at 600 °C, all Raman peaks shifted by  $\sim 5 \text{ cm}^{-1}$  to higher frequencies, similar to the trend observed in heat-treated LCO, indicating non-stoichiometric changes and improved crystallinity.

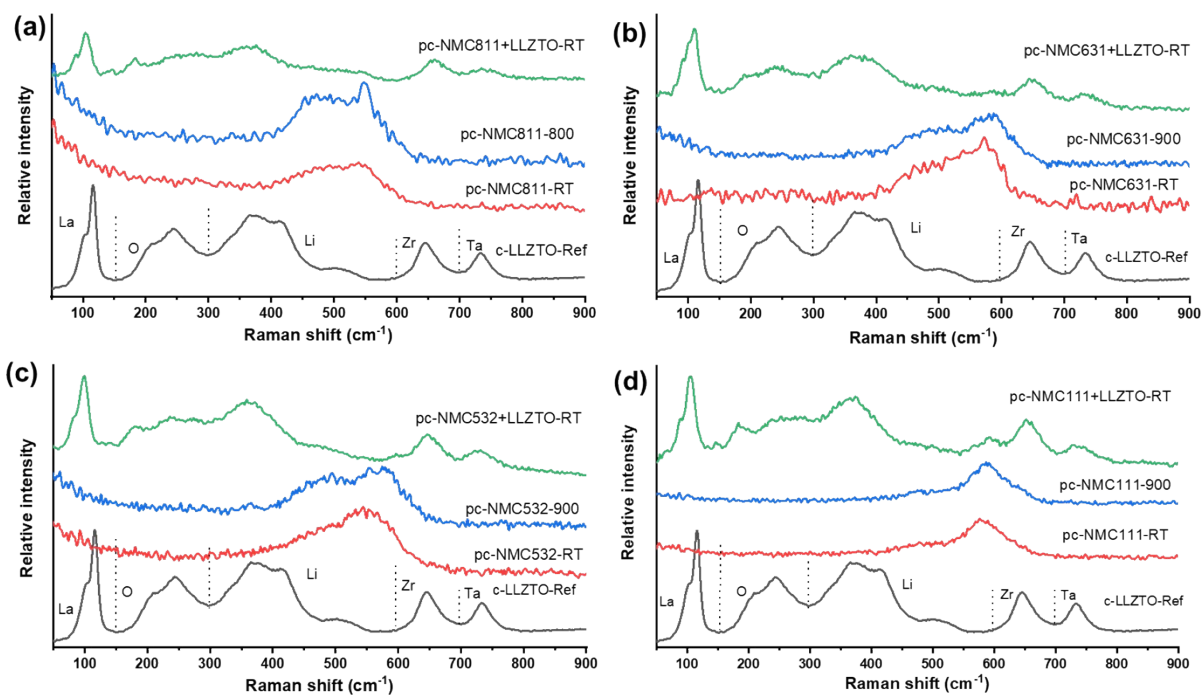

**Fig. S6** Raman spectra of (a) pc-NMC811 (b) pc-NMC631, (c) pc-NMC532, and pc-NMC111 before and after heat-treatment. Reference spectra of cubic LLZTO and pc-NMC+LLZTO-RT are provided for comparison.

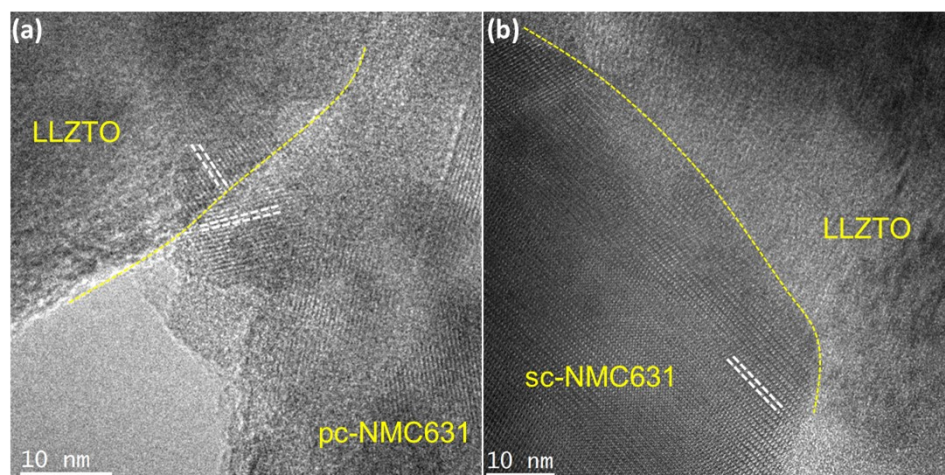

**Fig. S7** HR-TEM images of (a) pc-NMC631+LLZTO-900 and (b) sc-NMC631+LLZTO-900.



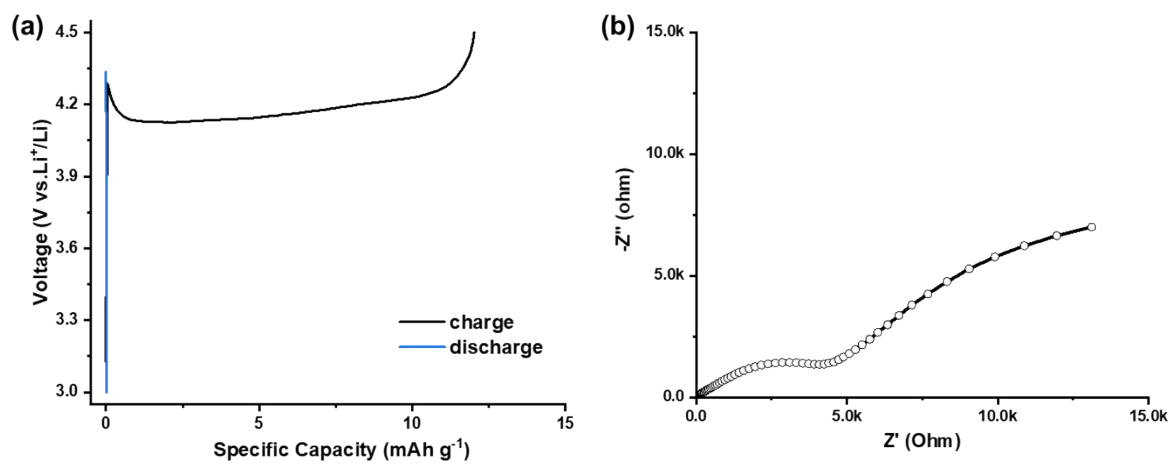

**Fig. S8** ASSB based on pc-NMC631+LLZTO-900: (a) charge-discharge profiles at 0.05C and (b) Nyquist plots.

The developed all-solid-state battery exhibits a large charge transfer resistance and significant potential polarization. Unfortunately, it only charged 12 mAh/g capacity then failed.
